# Supplementary material
Source: PubMed Central journal article supplement (PMC6613106)
Supplement: pnas.1905961116.sapp.pdf [file pnas.1905961116.sapp.pdf]

## Supplementary Information for

### **The network organization of intrathalamic macroconnections compared with other forebrain divisions**

Larry W. Swanson, Olaf Sporns, and Joel D. Hahn

Larry W. Swanson

Email: [larryswanson10@gmail.com](mailto:larryswanson10@gmail.com)

#### **This PDF file includes:**

Figs. S1 and S2  
Tables S1 and S2  
Captions for Datasets S1 and S2  
References for SI reference citations

#### **Other supplementary materials for this manuscript include the following:**

Datasets S1 and S2

### Hierarchy

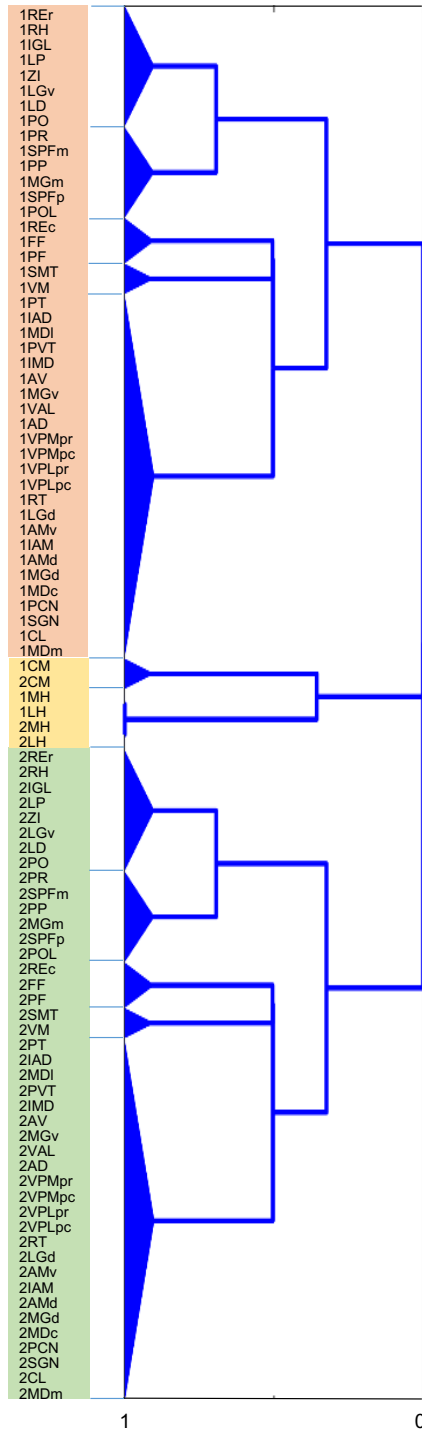

**Fig. S1.** Subsystem hierarchical organization of the bilateral intrathalamic co-classification matrix shown in Fig. 6. Compare with hierarchical organization of the unilateral intrathalamic co-classification matrix shown in Fig. 5.

**A****Connection Matrix**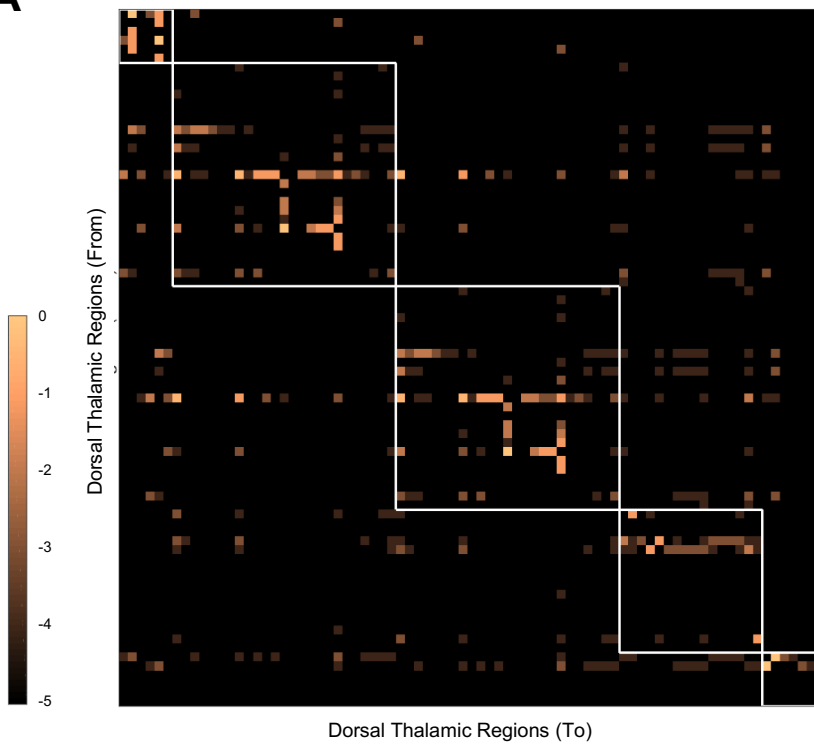**B****Co-Classification Matrix**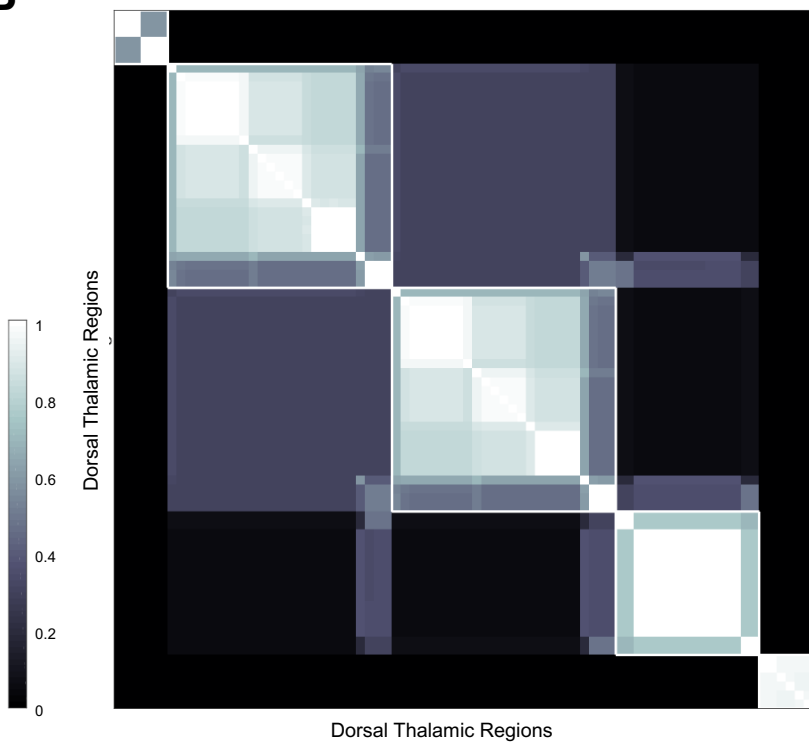**Hierarchy**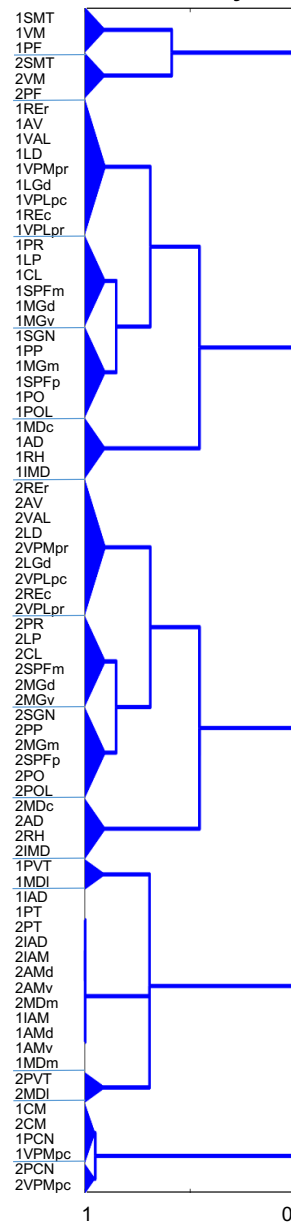

**Fig. S2.** Connection and co-classification network matrices for the bilateral intra-dorsal thalamic (THd2) subconnectome. (A) Directed and weighted monosynaptic macroconnection matrix for the rat THd2 with gray matter region (nucleus or node) sequence in a modular or subsystem arrangement derived from MRCC analysis (shown in B). Connection weights are represented on a  $\log_{10}$  scale (left). Four top-level modules are outlined in white. (B) Complete co-classification matrix obtained from MRCC analysis (as in A) for the 39 THd gray matter regions on each side of the brain. The co-classification index (left), ordering, and hierarchical arrangement are as in Fig. 5. Region abbreviations are defined in Dataset S2.

**Table S1.** Aggregate connection weights between the three subdivisions of the thalamus (The, epithalamus; THv, ventral thalamus; THd, dorsal thalamus) on one side of the brain.

| From | To     |        |        |
|------|--------|--------|--------|
|      | The    | THv    | THd    |
| The  | 0.0375 | 0.0002 | 0.0121 |
| THv  | 0.0002 | 0.1335 | 0.1018 |
| THd  | 0.0001 | 0.0249 | 0.0021 |

**Table S2.** Aggregate connection weights between the three subdivisions of the thalamus (The, epithalamus; THv, ventral thalamus; and THd, dorsal thalamus) on both sides of the brain.

**Table S2.** Aggregate connection weights between the three subdivisions of the thalamus (The, epithalamus; THv, ventral thalamus; THd, dorsal thalamus) on both sides of the brain.

| From | To     |        |        |        |        |        |
|------|--------|--------|--------|--------|--------|--------|
|      | The1   | THv1   | THd1   | The2   | THv2   | THd2   |
| The1 | 0.0375 | 0.0002 | 0.0121 | 0.1875 | 0.0002 | 0.0004 |
| THv1 | 0.0002 | 0.1335 | 0.1018 | 0.0000 | 0.0066 | 0.0057 |
| THd1 | 0.0001 | 0.0249 | 0.0021 | 0.0000 | 0.0001 | 0.0009 |
| The2 | 0.1875 | 0.0002 | 0.0004 | 0.0375 | 0.0002 | 0.0121 |
| THv2 | 0.0000 | 0.0066 | 0.0057 | 0.0002 | 0.1335 | 0.1018 |
| THd2 | 0.0000 | 0.0001 | 0.0009 | 0.0001 | 0.0249 | 0.0021 |

### Additional dataset S1 (separate Excel file)

**The complete collated macroconnection report dataset used for network analysis.** [\[link\]](#) The

sequence of tabulated connection reports follows the topographic arrangement of regions in a standard rat brain atlas (2). When multiple connection reports for a connection of interest were found, the one considered to be most valid was selected for network analysis as

detailed previously (1). Abbreviations for pathway tracers: ARGM, autoradiographic method; BDA, biotinylated dextran amine (M.W. 3,000 or 10,000); CTB, cholera toxin B subunit; CTB-gold, CTB conjugated to colloidal gold; CTB-HRP, CTB conjugated to horseradish peroxidase; HRP, horseradish peroxidase; PHAL, *Phaseolus vulgaris*-leucoagglutinin; rSINVirus, recombinant Sindbis virus; rVSVirus, recombinant vesicular stomatitis virus; WGA, wheat germ agglutinin; WGA-HRP-Gold, WGA conjugated to horseradish peroxidase.

### **Additional dataset S2 (separate Excel file)**

#### **Data matrices in Microsoft Excel (spreadsheet) file format for the connections of the rat**

**thalamus.** [link] Data were extracted from connection reports in the primary literature. The Excel file has 5 worksheets. The first worksheet provides an annotated list of connection report weight categories, their abbreviations, and correspondence between these terms and their assigned numerical values for collated (raw) and binned data. Worksheets 2-5 provide rat thalamus macroconnection data in binned and collated (raw) format arranged by subsystem (modularity) for the bilateral thalamic subconnectome (TH2) (see also Fig. 1), and for the unilateral thalamic subconnectome (TH1) (see Fig. 5). Matrix directionality is from y-axis to x-axis.

### **References for Supporting Information**

1. Swanson LW, Hahn JD, Jeub LGS, Fortunato S, & Sporns O (2018) Subsystem organization of axonal connections within and between the right and left cerebral cortex and cerebral nuclei (endbrain). *Proc Natl Acad Sci USA*. 115(29):E6910-E6919.

2. Swanson LW (2018) Brain maps 4.0—Structure of the rat brain: an open access atlas with global nervous system nomenclature ontology and flatmaps. *J Comp Neurol* 526(6):935-943.
